# Supplementary material
Source: MDPI journal article supplement (https://www.mdpi.com/2071-1050/14/3/1804)
Supplement: s1 [file s1]

Archive with 2 entries (2 files):
- Supplemental Materials/Figure S1 - Sustainability Article Partners Map.pdf
- Supplemental Materials/Supplemental Material - End-of-Course Survey Questions.pdf
