# Supplementary material
Source: MDPI journal article supplement (https://www.mdpi.com/2071-1050/14/3/1804)
Supplement: s1 [file s1 › Supplemental Materials/Supplemental Material - End-of-Course Survey Questions.pdf]

## **End-of-Course Survey Questions**

1. Which course did you take? (response required)

- Climate Stewards course
- California Naturalist course

2. Which organization did you take the course with? (dropdown) (response required)

- American River College
- American River Conservancy
- Audubon Canyon Ranch: Bouverie/Martin Griffin Preserve
- Bolsa Chica Conservancy
- Butte Environmental Council
- Calaveras Big Trees State Park Association
- Catalina Island Conservancy
- Chico Creek Nature Center
- City College of San Francisco
- Camp Ocean Pines
- College of the Redwoods
- Columbia College
- Community Environmental Council
- Community Nature Connection
- Conservation Society of California/Oakland Zoo
- Cuesta College Community Programs
- Dominguez Rancho Adobe Museum
- Effie Yeaw Nature Center
- Emerald Cove Outdoor Science Institute, Inc.
- Friends of the Dunes
- Grassroots Ecology
- Hopland Research & Extension Center
- Jepson Herbarium at UC Berkeley
- LA Arboretum Foundation
- Lake Tahoe Community College
- Las Positas College
- Midpeninsula Regional Open Space District
- Mount Diablo Region/Lindsay Wildlife Experience
- National Forest Foundation: Cleveland
- National Forest Foundation: Angeles/San Gabriel Mountains
- Nature For All
- Ojai Valley Land Conservancy
- Pacific Grove Museum of Natural History
- Palomar Community College
- Pasadena City College
- Pepperwood
- Point Reyes National Seashore Association
- Preserve Calavera
- Riverside-Corona Resource Conservation District

- Santa Barbara Botanic Garden
- Santa Clara County Parks
- Sequoia Parks Conservancy
- Sierra Foothill Conservancy
- Sierra Streams Institute
- Sonoma Ecology Center
- Southern California Mountains Foundation: Big Bear Discovery Center
- Southern California Mountains Foundation: Urban Conservation Corps of the Inland Empire
- SPAWN Marin County
- Stewards of the Coast & Redwoods
- Tuleyome
- UC Berkeley Sagehen Creek Field Station
- UC Davis: Wild Davis
- UC Merced Vernal Pools & Grasslands Reserve
- UC Merced Yosemite Field Station
- UC Santa Cruz Arboretum
- USC Sea Grant and SEA Lab
- USC Sea Grant and USC
- UC Riverside Palm Desert Center
- West LA College
- West Valley College
- Wishtoyo Foundation
- Yolo Basin Foundation
- Other

- a. Display This Question, If Q2 = Other
- Other Organization (please specify below) (short answer)

3. Please enter the "start date" (mm/dd/yyyy) of the course you took. (response required)

### **Part I. Questions About You**

4. What is your gender?
- Woman
  - Man
  - Non-binary
  - Gender identity not listed above (please specify below)
  - Prefer not to state
5. What is your age? (short answer) (response required)
6. Are you Hispanic or Latino? (Hispanic or Latino: a person of Cuban, Mexican, Chicano, Puerto Rican, South or Central American, or other Spanish culture or origin, regardless of race)

- No, I am not Hispanic or Latino
- Yes, I am Hispanic or Latino
- Prefer not to state

7. What is your race? (Select all that apply.)

- American Indian or Alaska Native: a person having origins in any of the original peoples of North and South America—including Central America—and who maintains tribal affiliation or community attachment
- Asian: a person having origins in any of the original peoples of the Far East, Southeast Asia, or the Indian subcontinent including, for example, Cambodia, China, India, Japan, Korea, Malaysia, Pakistan, The Philippine Islands, Thailand and Vietnam
- Black or African American (not of Hispanic origin): a person having origins in any of the black racial groups of Africa
- Native Hawaiian or Pacific Islander: a person having origins in any of the original peoples of Hawaii, Guam, Samoa, or other Pacific Islands
- White (not of Hispanic origin): a person having origins in any of the original peoples of Europe, the Middle East or North Africa
- Race not listed above (please specify below)
- Prefer not to state

8. What is the highest degree you have attained?

- Some high school
- High School diploma/G.E.D
- Some college
- Technical/Associate/Junior College degree (e.g., 2-year, LPN)
- Bachelor's degree/BA, BS, RN
- Graduate degree (e.g., Master's, PhD, Medical, Law etc.)

9. What best describes your current work status (please check all that apply)?

- Work full-time
- Work part-time
- Not currently employed
- Full time at-home partner/spouse/caregiver
- Retired
- Part-time student
- Full-time student
- Volunteer

10. Which of the following best describes your current occupation (or your last occupation if not currently employed)

- K-12 Teacher

- Post-Secondary Teacher
- Nonformal Educator/Interpreter
- Park Ranger (local, state, national)
- Conservation Corps (e.g., Local Corps, CCC, AmeriCorps, or other Career or Workforce Development Program)
- Farmer/Rancher
- Community college or university student
- Other (please specify below)

11. What is your approximate yearly household income?

- Less than \$14,999
- \$15,000-\$24,999
- \$25,000-\$49,999
- \$50,000-\$74,999
- \$75,000-\$99,999
- \$100,000-\$149,999
- \$150,000-\$199,999
- \$200,000+

12. How long have you lived in California?

- Less than 5 years
- 5-10 years
- 11-20 years
- 21-30 years
- 30+ years

## **Part II. About This Course**

13. Display This Question, If Q3 = California Naturalist

Please choose all the reasons you had for registering for the course: (randomized)

- Academic credit
- Obtain UC Certification
- Career development
- Spend time outside
- Spend time with friends or family
- Learn about conservation issues
- Meet others with similar interests
- Learn more about the local environment
- Access to volunteer opportunities
- Other (please specify below)

14. Display This Question, If Q3 = Climate Stewards

Please choose all the reasons you had for registering for the course: (randomized)

- Academic credit
- Obtain UC Certification
- Career development
- Spend time with friends or family
- Learn about community resilience
- Meet others with similar interests
- Learn how to communicate about climate change
- Learn more about climate science
- Learn more about solutions to climate change
- Access to volunteer opportunities
- Other (please specify below)

15. Overall, how satisfied were you with the course you attended?

- Not satisfied
- Somewhat unsatisfied
- Neither unsatisfied nor satisfied
- Somewhat satisfied
- Very Satisfied

16. What do you think is missing from this course? (short answer)

17. Do you plan to be engaged in this field or any related fields in the coming year through volunteer service or work for pay?

- Volunteer service
- Work for pay

a. Display This Question, If Q17 = Volunteer Service

- Did participating in the course improve your capacity to do volunteer service? (select all that apply)
  - It improved my capacity to do my current volunteer service
  - It improved my capacity and I plan to volunteer more in the coming year
  - It did not improve my capacity to do volunteer service

b. Display This Question, If Q17 = Work for Pay

- Did participating in the course improve your capacity to do the work you are currently doing or work you would like to do in the future? (select all that apply)
  - It improved my capacity to do my current work
  - It improved my capacity toward work I would like to do in the future
  - It did not improve my capacity to do work for pay

18. Display This Question, If Q11 = Conservation Corps

- Did the California Naturalist class change your academic or career goals in any way?
  - Yes
  - No

19. Display This Question, If Q21 = Yes

- Please describe how your academic or career goals have changed. (short answer)

20. How would you rate the performance of your lead instructor?

- Poor
- Needs Improvement
- Good
- Very Good

21. Was there anything you found to be exemplary in the lead instructor's presentation of material? Please describe. (short answer)

22. Please provide any constructive comments to improve the lead instructor's performance. (short answer)

23. In general, how would you rate the performance of the guest presenters?

- Poor
- Needs Improvement
- Good
- Very Good

24. Was there a guest presenter you found to be exemplary in their presentation of material? Please describe. (short answer)

25. Was there a guest presenter you thought needed some improvement in their presentation of material? Please describe. (short answer)

Thanks for your candid program evaluation! Next, we'll ask some questions about your perspectives on science and the environment.

**Part III.** For this next set of questions, we would like you to respond based on how you feel/believe/think about each statement **BEFORE** participating in the course and **AFTER** participating. That is, please indicate how true each of the following statements **WAS** for you before participating in the course and how you feel/believe/think **NOW** that you have completed the course.

26. These statements are about how you felt **BEFORE** the course and how you feel **CURRENTLY** about **your capacity to address environmental issues**.

Please indicate how much you **DISAGREE** or **AGREE** with each of the following statements about your influence on the environment by selecting the appropriate column. (randomized)

[illegible]







|                                                                           |   |   |   |   |   |   |   |   |   |   |
|---------------------------------------------------------------------------|---|---|---|---|---|---|---|---|---|---|
| online and print resources as well as local experts to identify organisms |   |   |   |   |   |   |   |   |   |   |
| Understand the data fields when adding an observation to iNaturalist      | ○ | ○ | ○ | ○ | ○ | ○ | ○ | ○ | ○ | ○ |
| Successfully submit my observations to iNaturalist                        | ○ | ○ | ○ | ○ | ○ | ○ | ○ | ○ | ○ | ○ |
| Use iNaturalist functions beyond submitting an observation                | ○ | ○ | ○ | ○ | ○ | ○ | ○ | ○ | ○ | ○ |
| Communicate with others on iNaturalist                                    | ○ | ○ | ○ | ○ | ○ | ○ | ○ | ○ | ○ | ○ |
| Recruit others to participate in iNaturalist                              | ○ | ○ | ○ | ○ | ○ | ○ | ○ | ○ | ○ | ○ |

30. Display This Question, If Q3 = **Climate Stewards** course

These statements are about how you felt **BEFORE** the course and how you feel **CURRENTLY** about **learning climate stewardship topics** (i.e., science, solutions, resilience).

Please indicate how much you **DISAGREE** or **AGREE** with each of the following statements about science by selecting the appropriate column.

**In general, why do you choose to learn and understand climate stewardship topics?**  
(randomized)

[illegible]

31. Display This Question, If Q3 = **Climate Stewards** course

These statements are about your **communications-related skills**. For the following statements listed below, please indicate how true each was for you **BEFORE** the course and is **NOW** by selecting the appropriate column.

**Begin each statement with "Before taking the course I had the skills necessary to..." or "I currently have the skills necessary to..." (randomized)**

[illegible]

|                                                                                           |   |   |   |   |   |   |   |   |   |   |
|-------------------------------------------------------------------------------------------|---|---|---|---|---|---|---|---|---|---|
| climate impacts                                                                           |   |   |   |   |   |   |   |   |   |   |
| Share mitigation and adaptation strategies to advance community and ecosystem resilience  | ○ | ○ | ○ | ○ | ○ | ○ | ○ | ○ | ○ | ○ |
| Talk about climate vulnerability and adaptive capacity among different stakeholder groups | ○ | ○ | ○ | ○ | ○ | ○ | ○ | ○ | ○ | ○ |

32. Thank you for answering our questions! We appreciate your time and attention. Is there anything else you would like to share with us about your experience? (short answer)

### **Valediction**

Your answers are a valuable part of this course evaluation, and will be used to help improve the program. Please press the yellow "Submit" button to record your responses.

If you would like to learn more about the California Naturalist Program, please visit connect with us through one of the options below.

<https://www.linkedin.com/showcase/california-naturalist>

<https://www.instagram.com/uccalnat/>

<https://www.facebook.com/CANaturalist>

<https://twitter.com/CANaturalist>

<http://calnat.ucanr.edu/>

[canaturalist@ucanr.edu](mailto:canaturalist@ucanr.edu)

**707-744-1424 x108**

UC Davis IRB ID 1797893
